# Supplementary material
Source: Springer Nature journal article supplement (https://www.springermedizin.de/resource/supplementary/12943_2010_710_MOESM2_ESM.pdf/9554630)

**A****p63 RNAi attenuates ATM mRNA levels**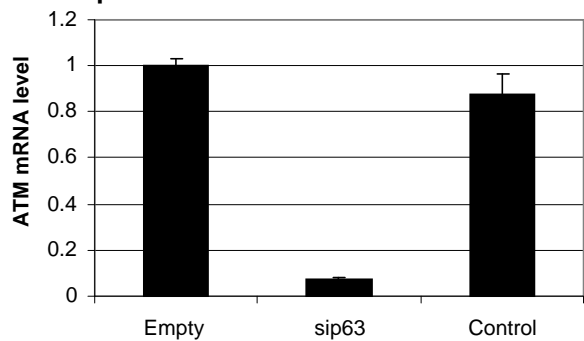**C****p63 RNAi inhibits HaCat proliferation**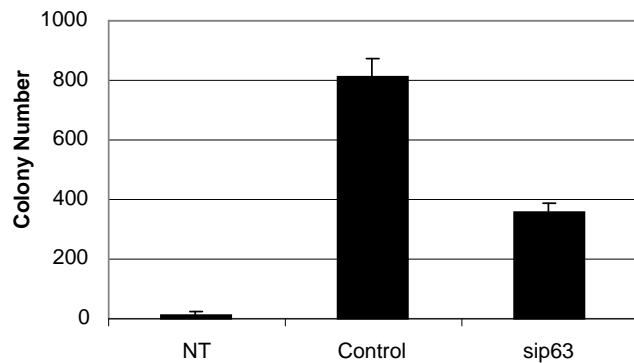**B**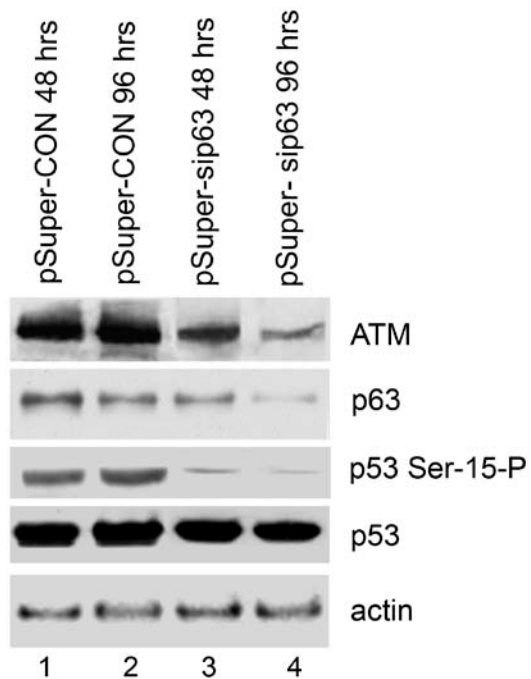**D****p63 RNAi inhibits ATM expression**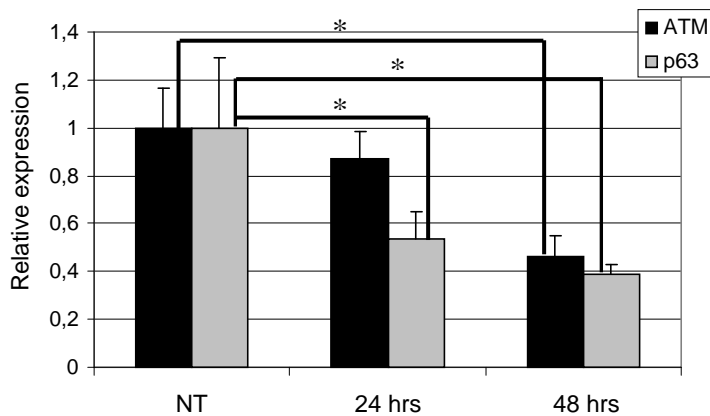

Supplement: MOESM2 [file 9554630]
